# Supplementary material
Source: Springer Nature journal article supplement (https://www.springermedizin.de/resource/supplementary/12882_2005_63_MOESM2_ESM.pdf/9454912)

**-EDTA**

**+EDTA**

**a**

**b**

**none**

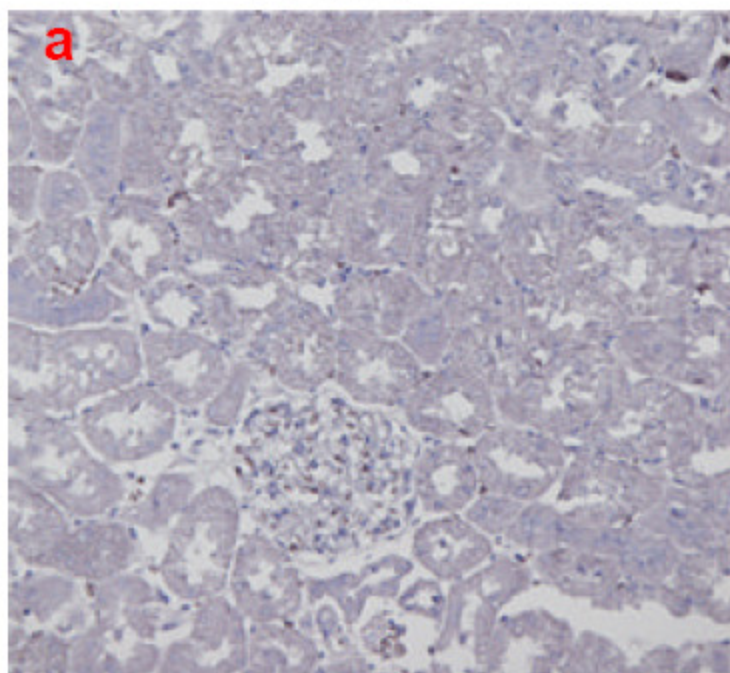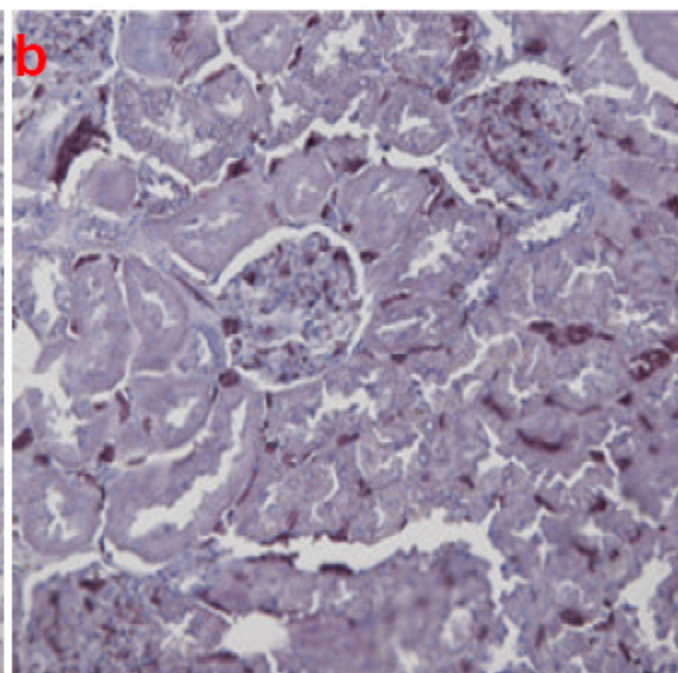

**c**

**d**

**Isc**

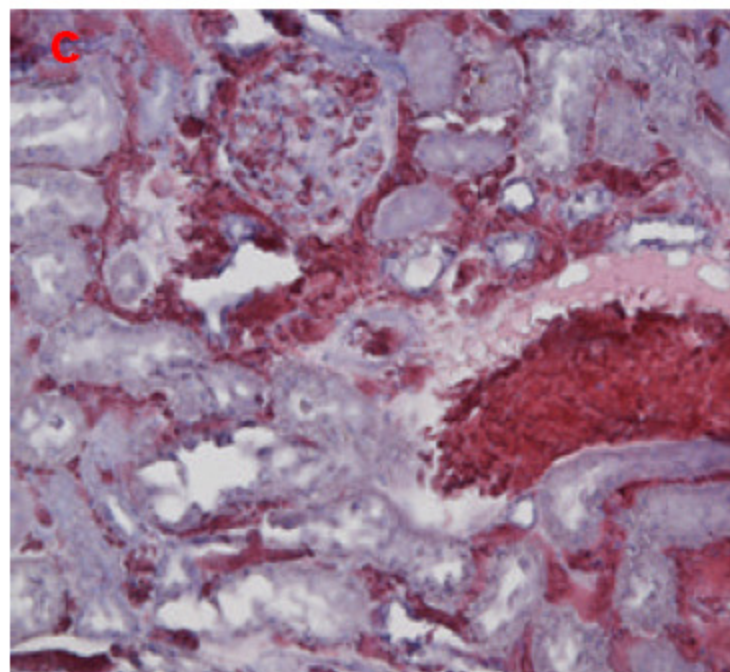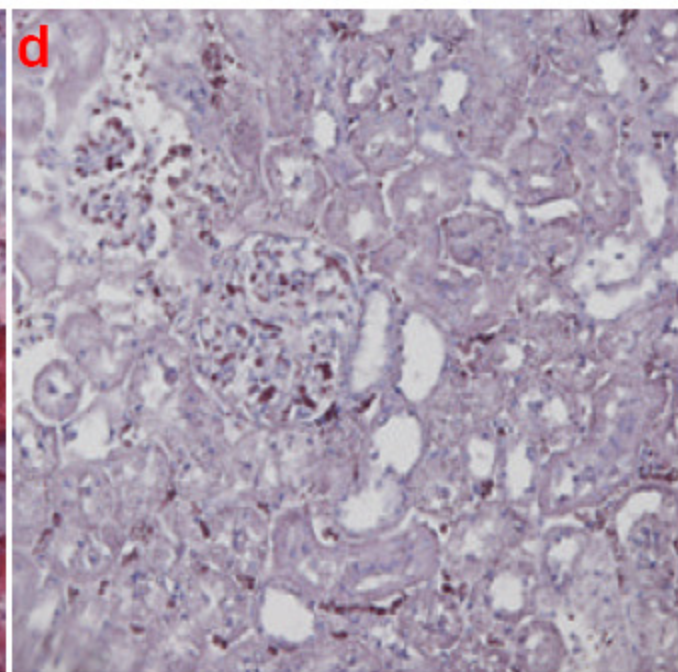

**e**

**f**

**Isc/R**

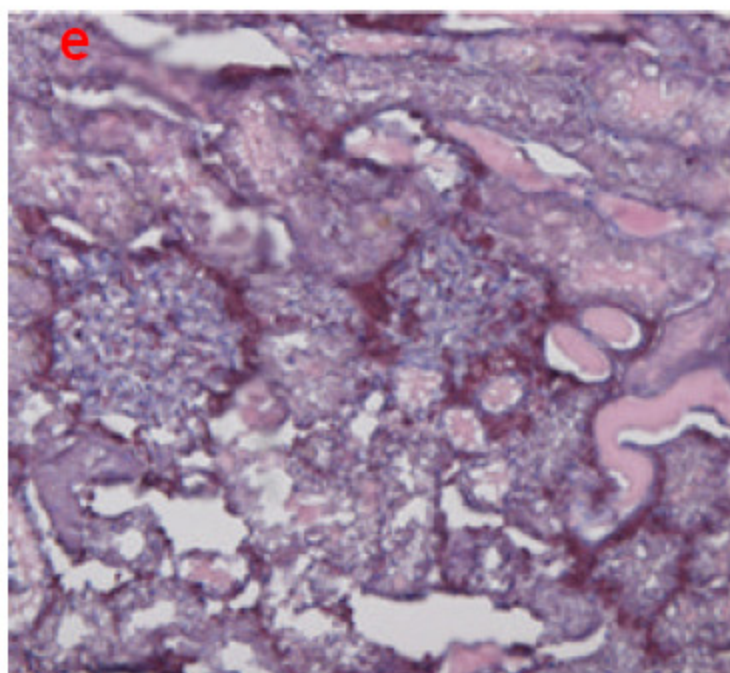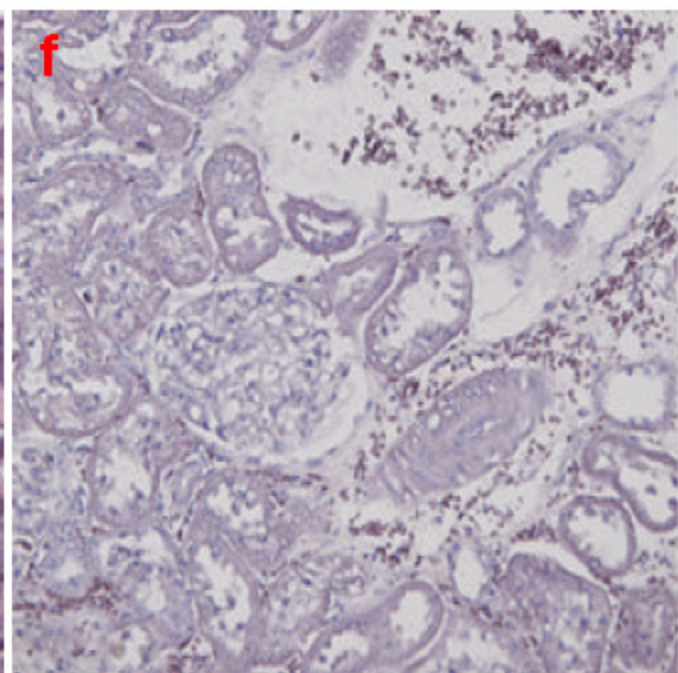

Supplement: MOESM2 [file 9454912]
